# Supplementary material for: Biomass, lipid accumulation kinetics, and the transcriptome of heterotrophic oleaginous microalga Tetradesmus bernardii under different carbon and nitrogen sources
Source: PubMed Central journal article supplement (PMC7789750; doi:10.1186/s13068-020-01868-9), 2021-01-06

Fig. S1

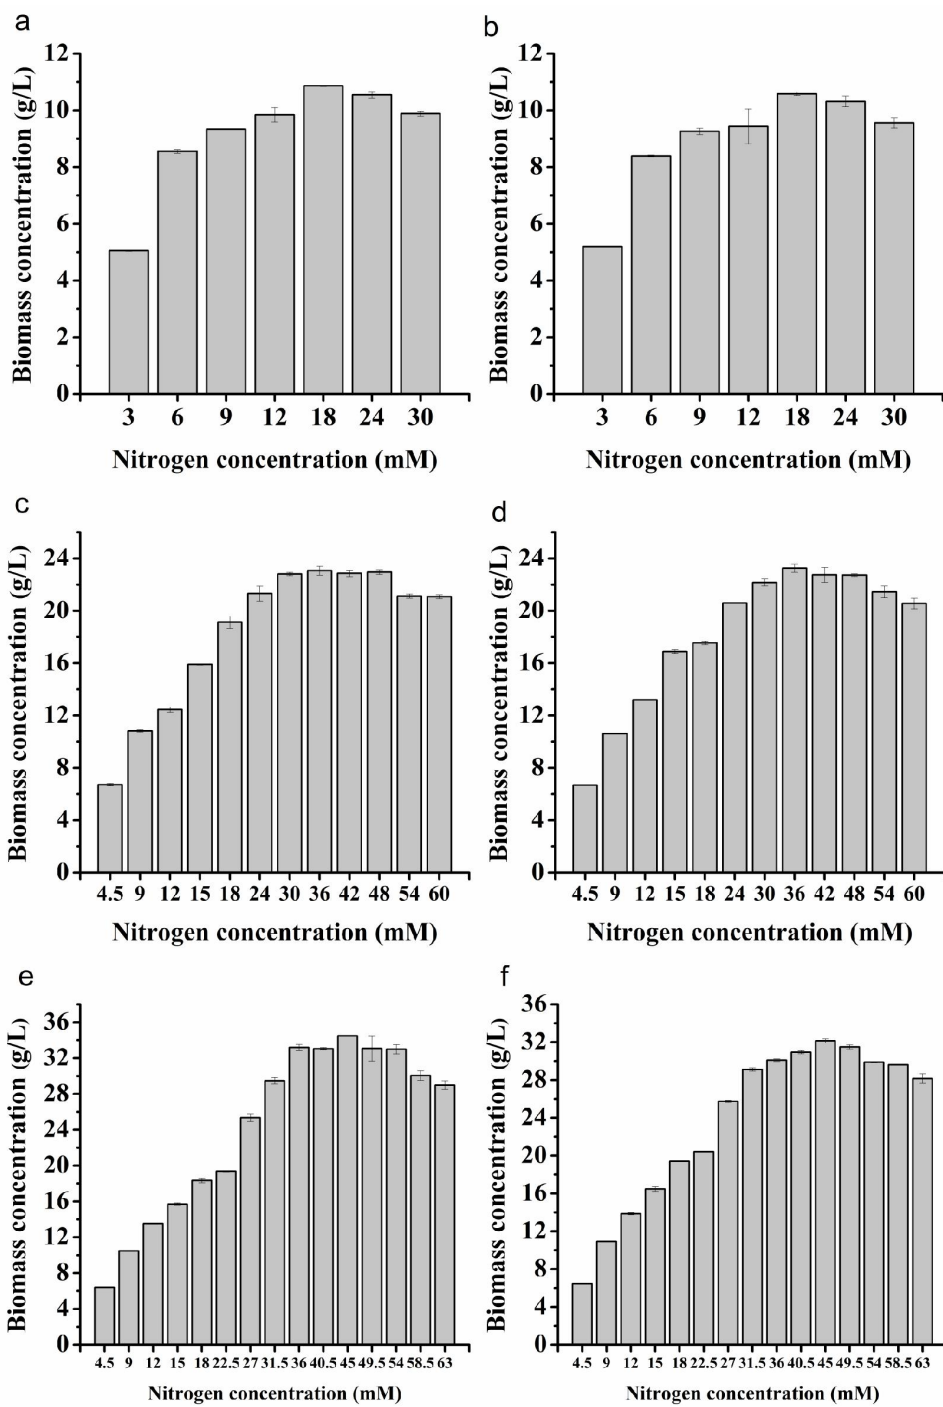

Fig. S2

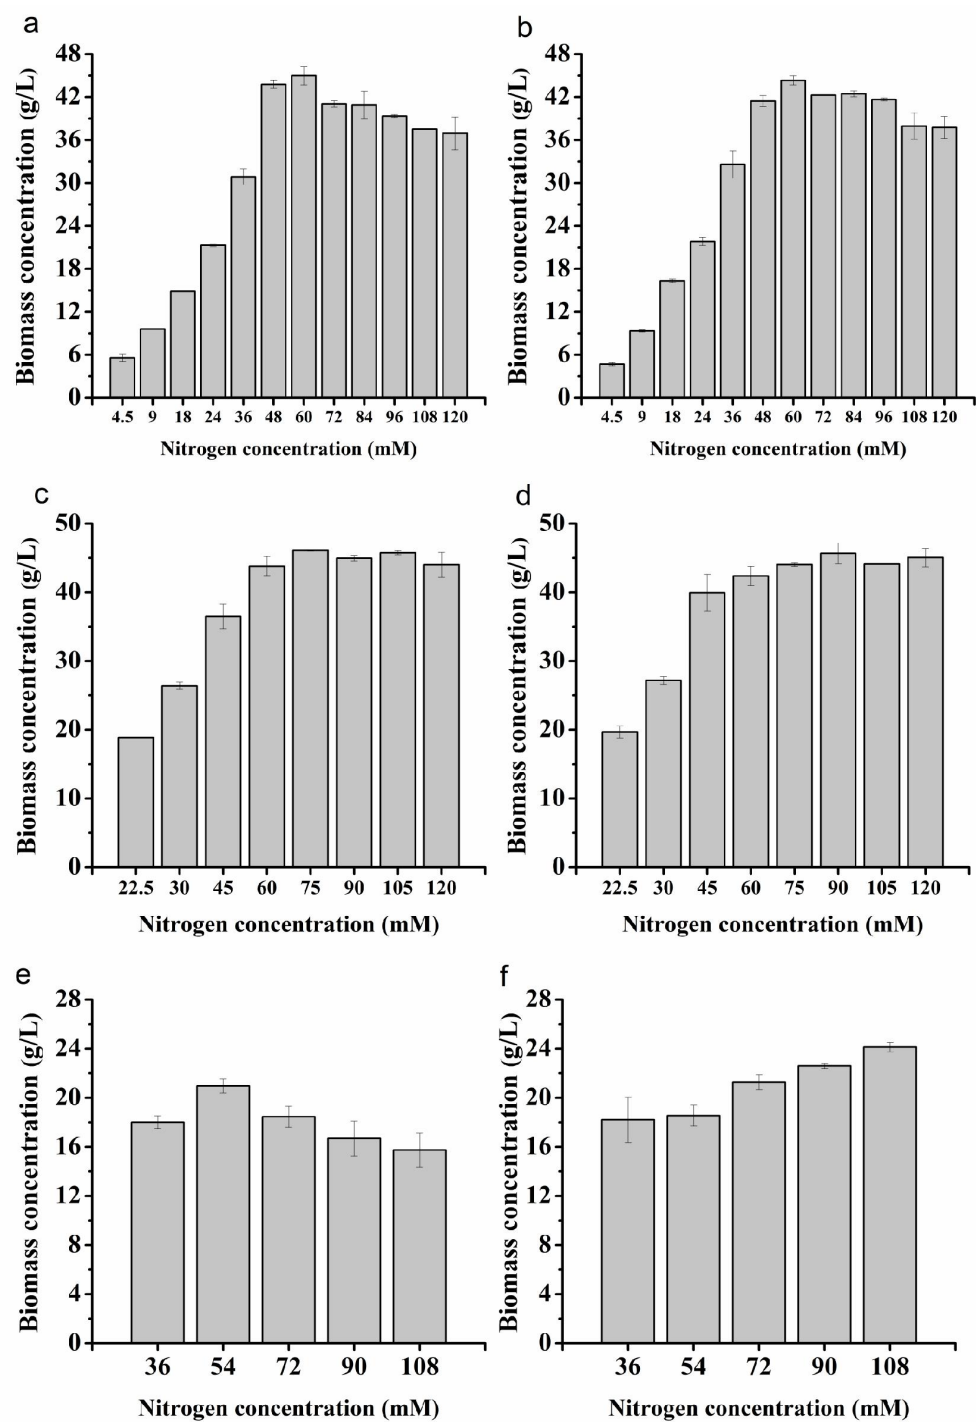

Fig. S3

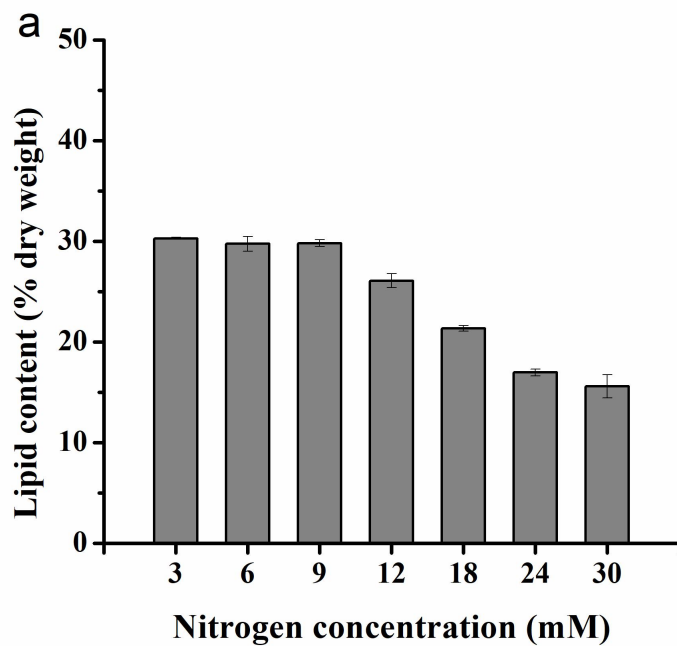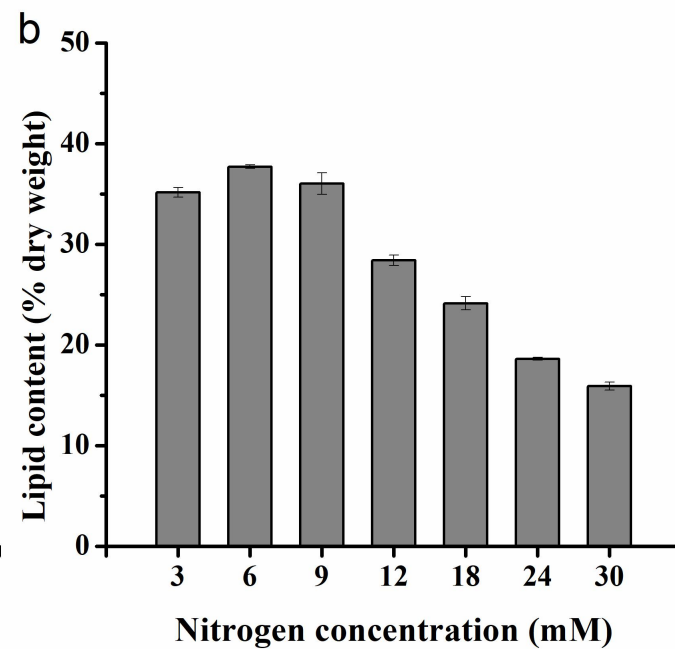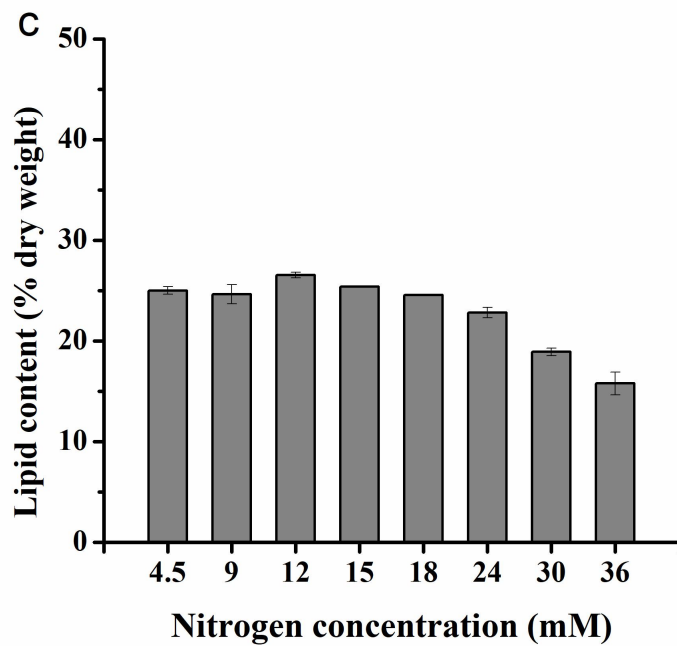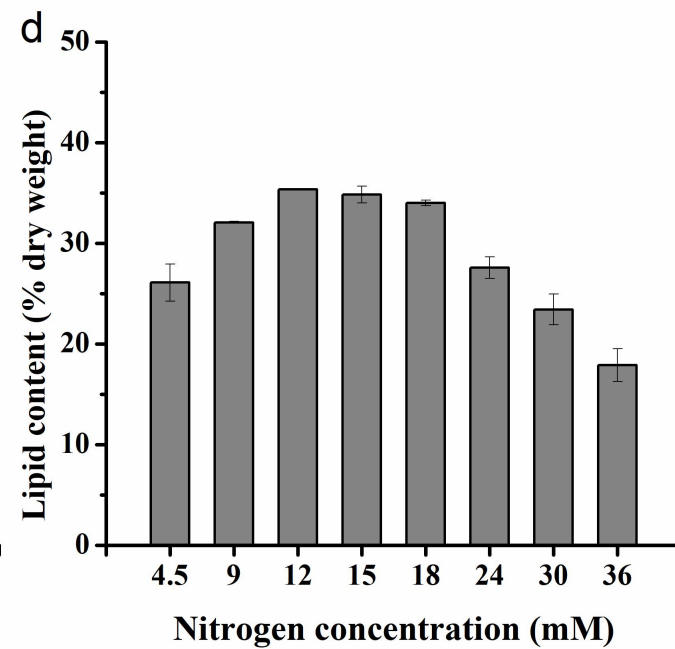

Fig. S4

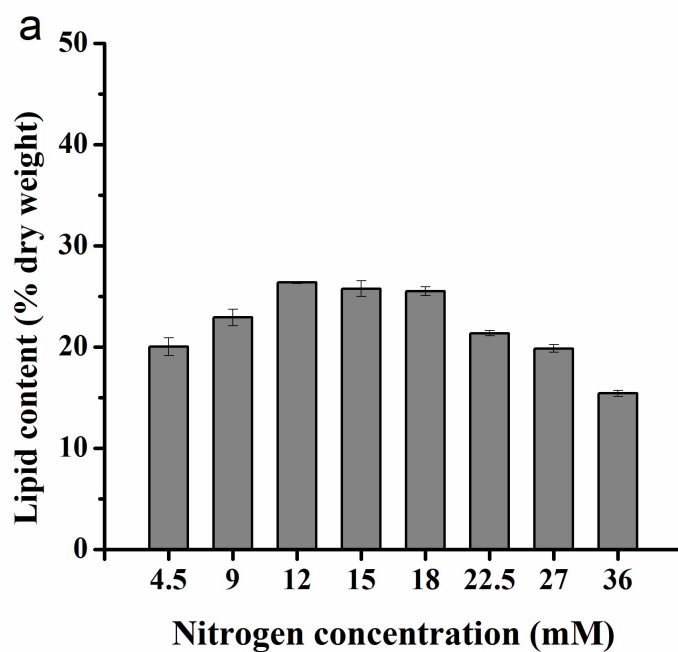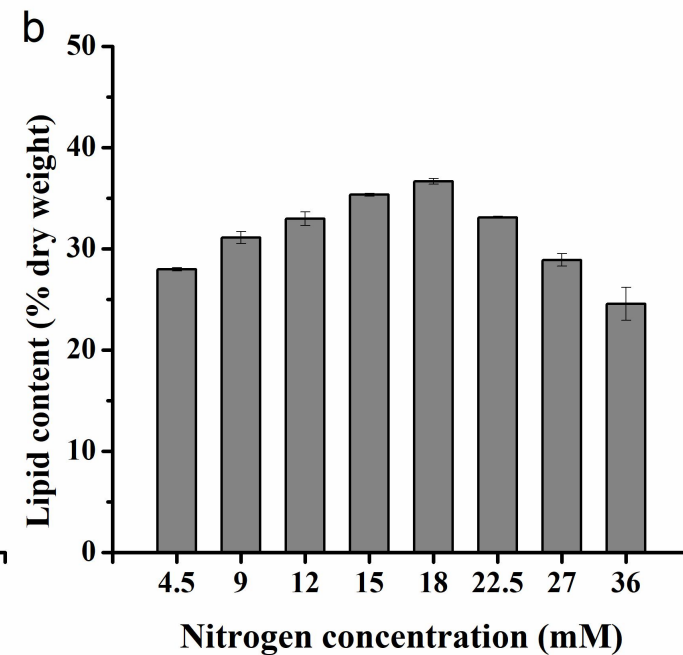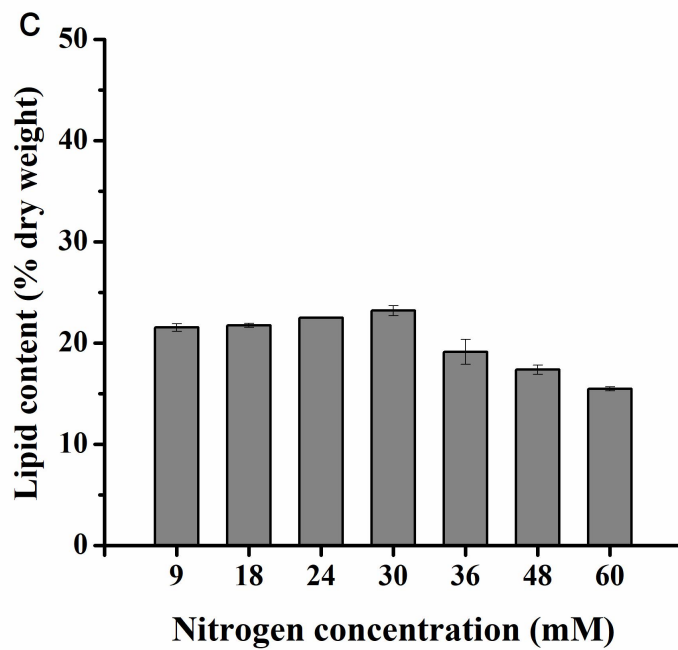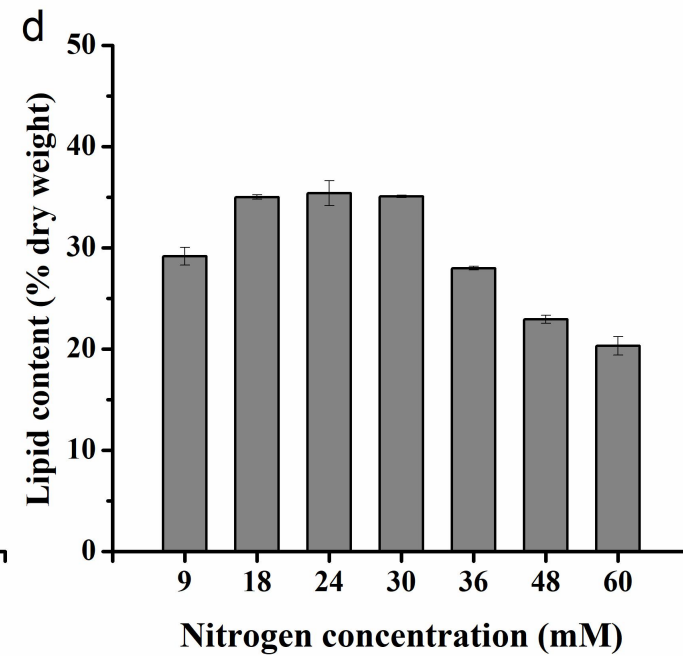

Fig. S5

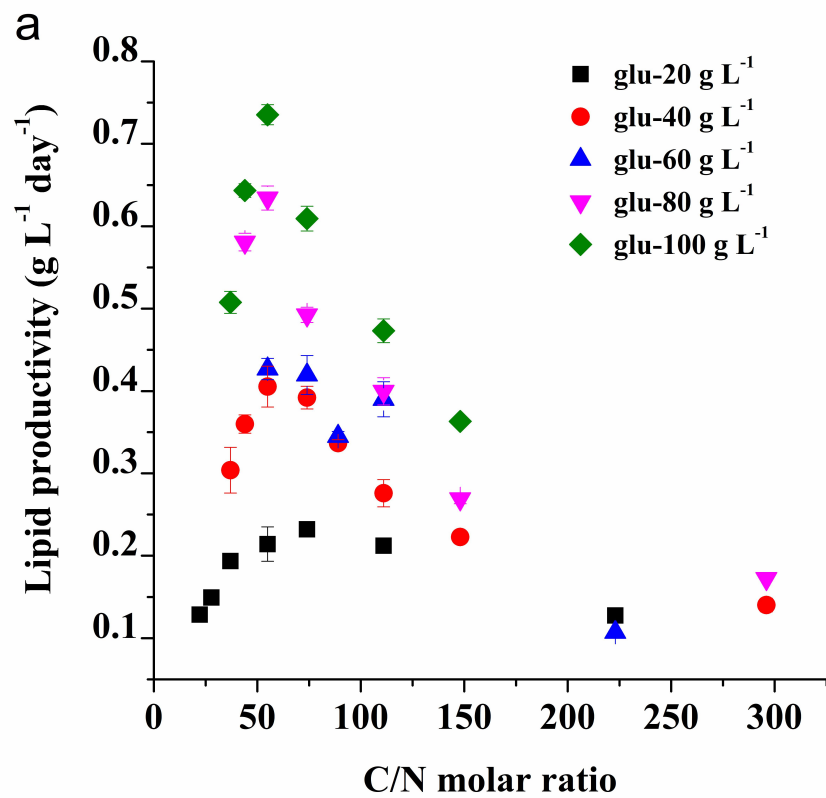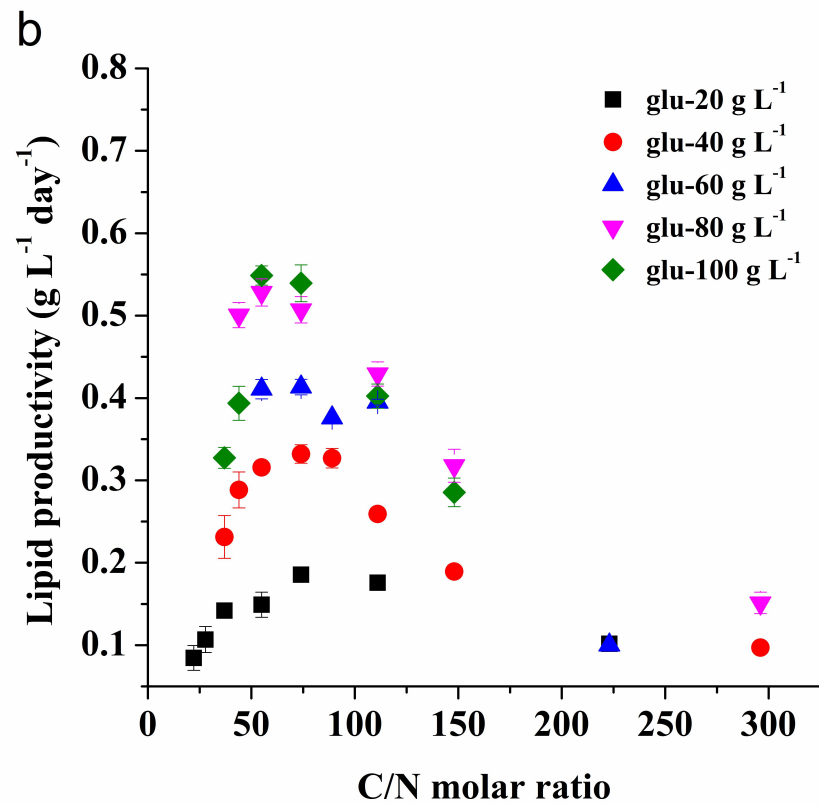

Fig. S6

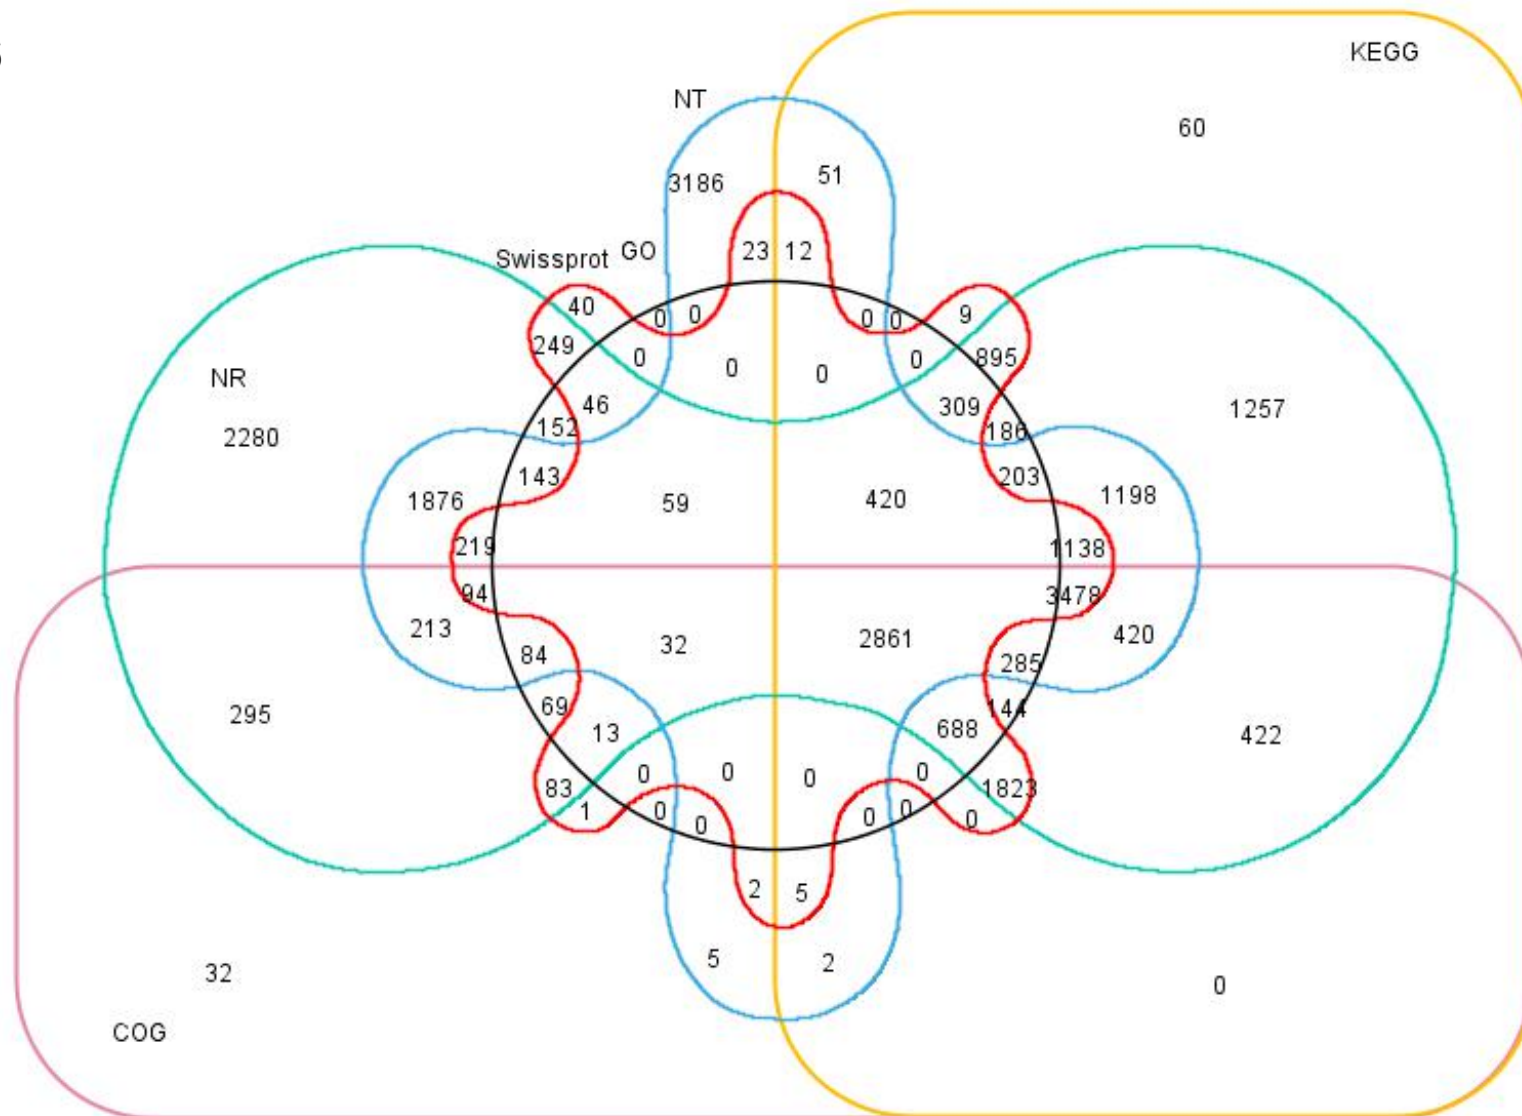

Fig. S7

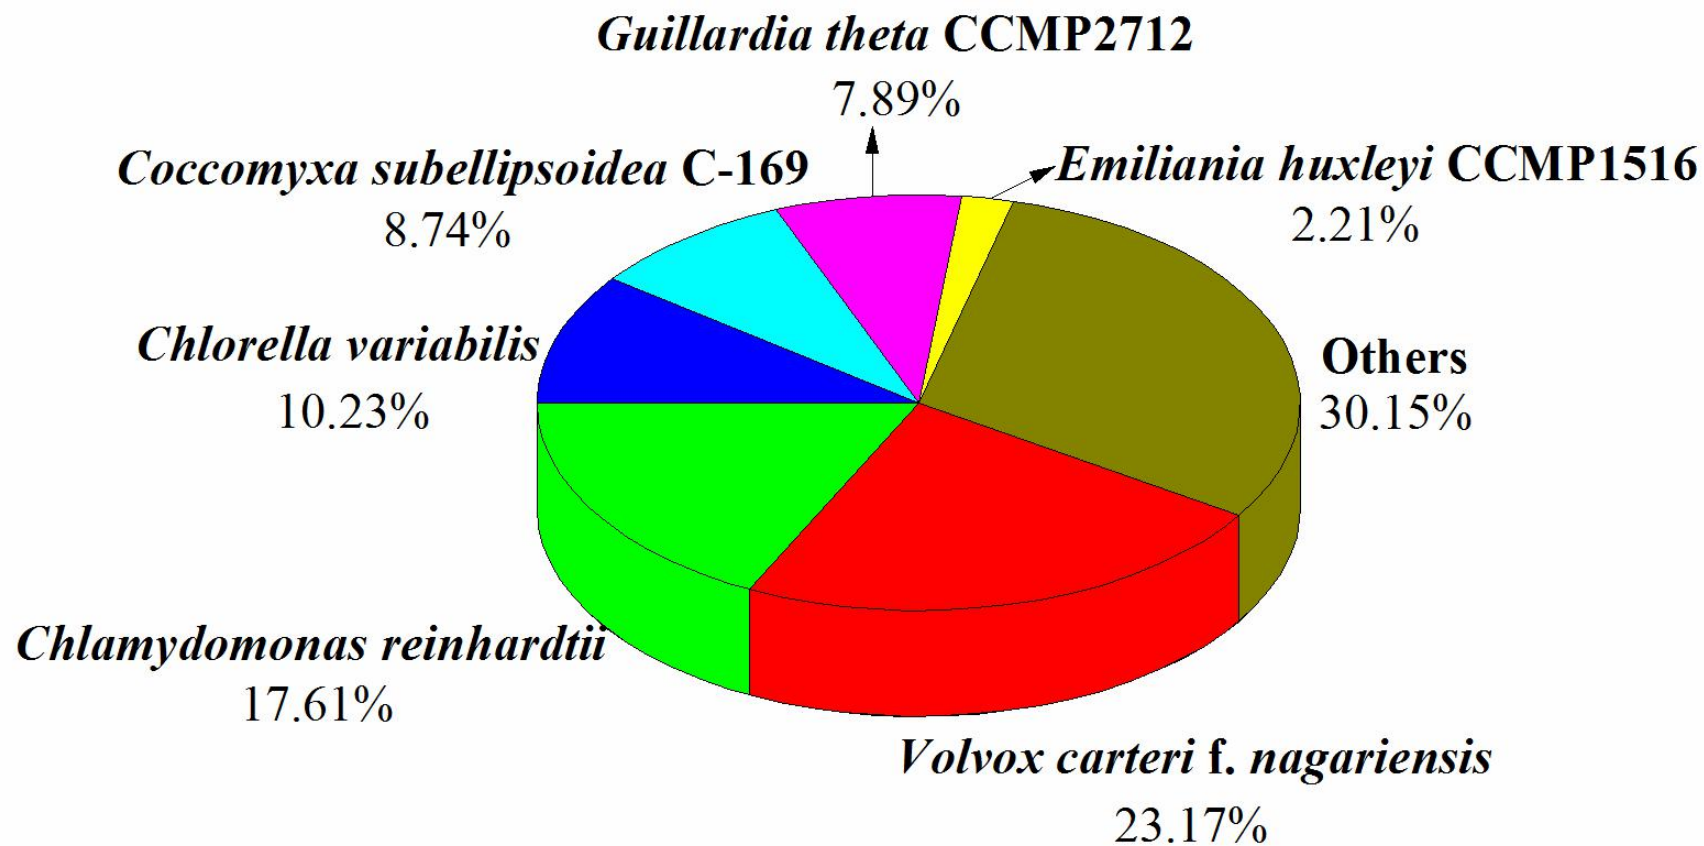

Fig. S8

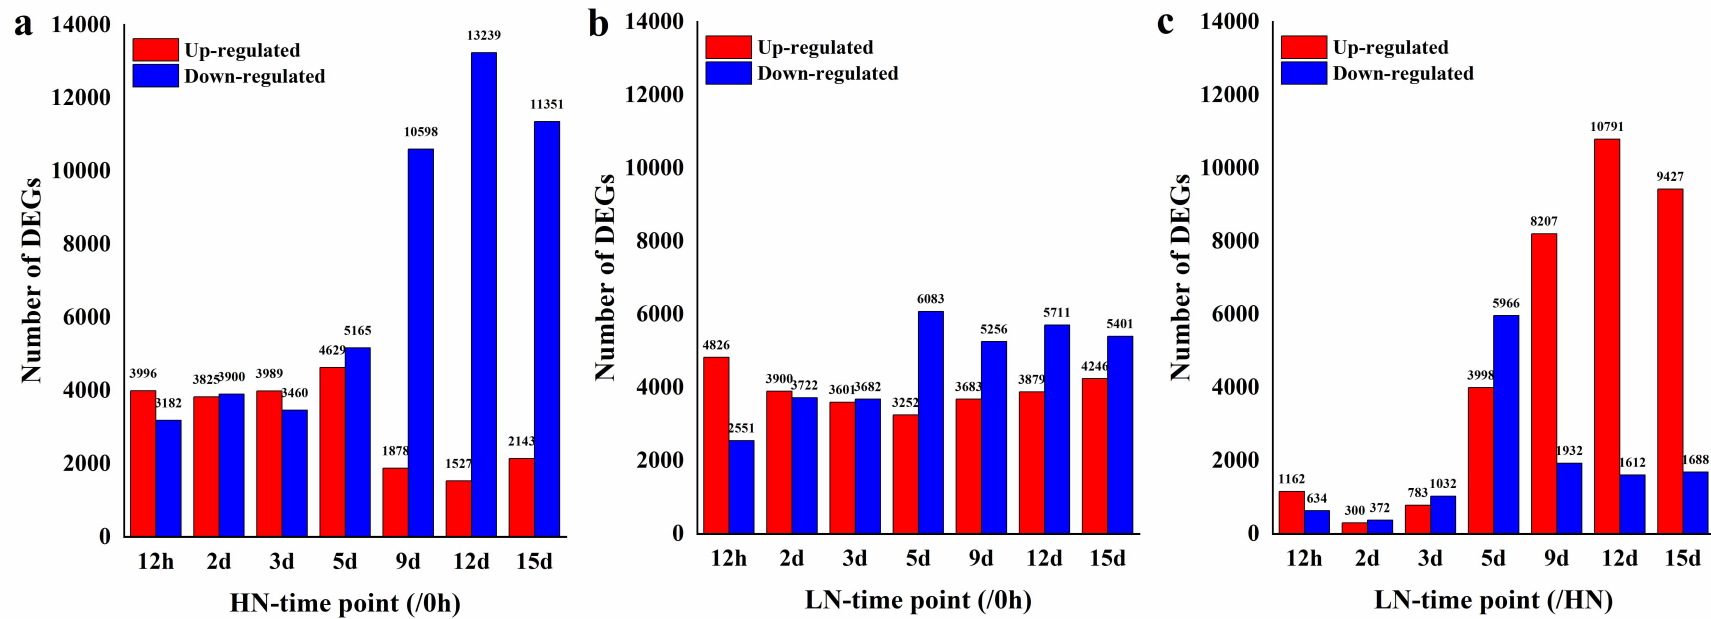



Fig. S9 a

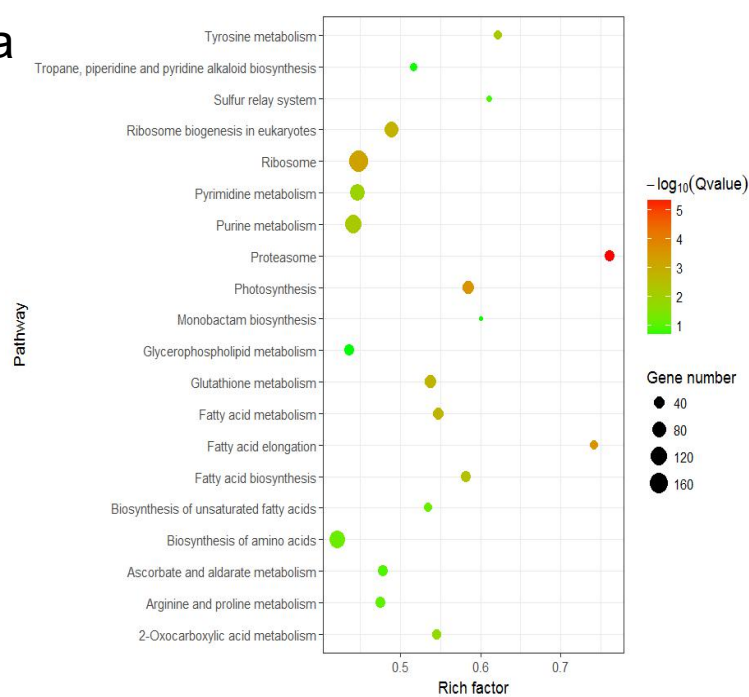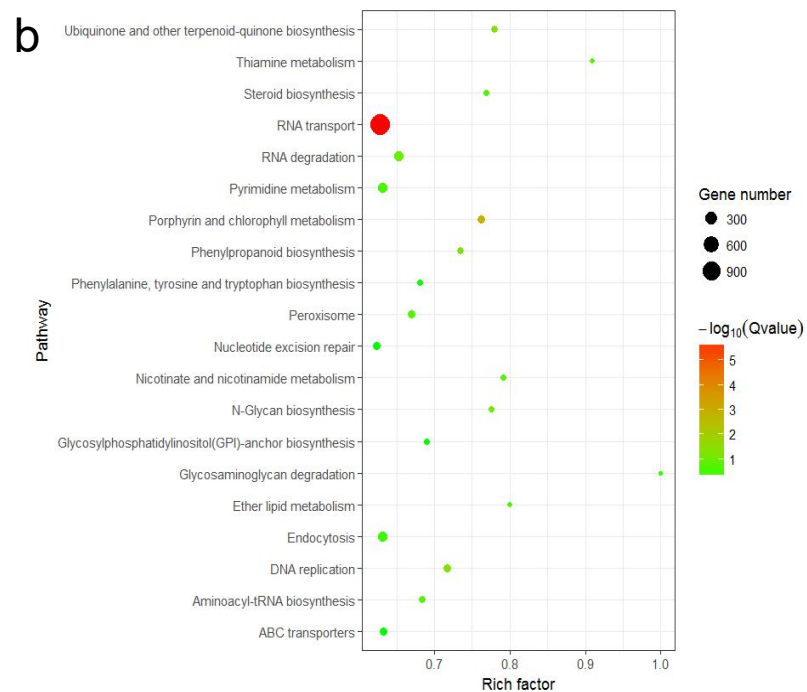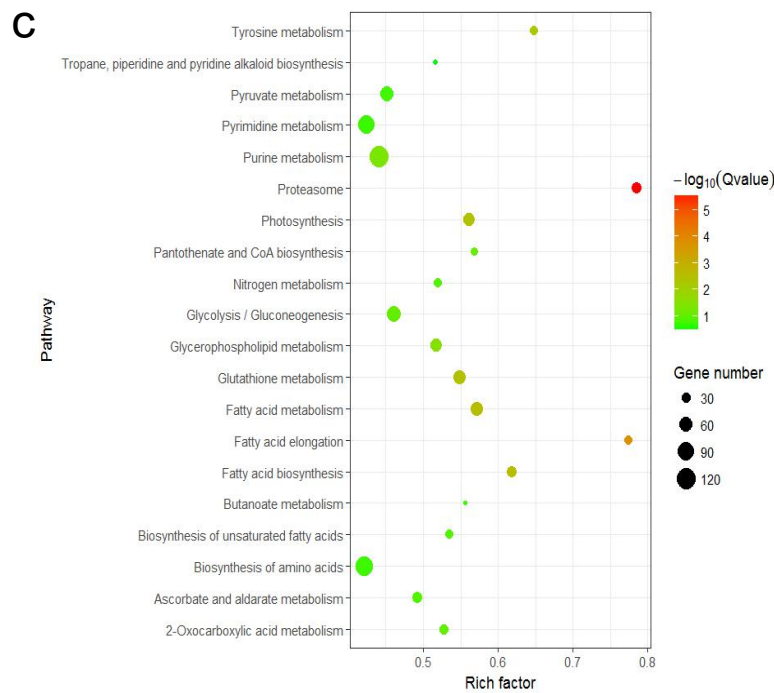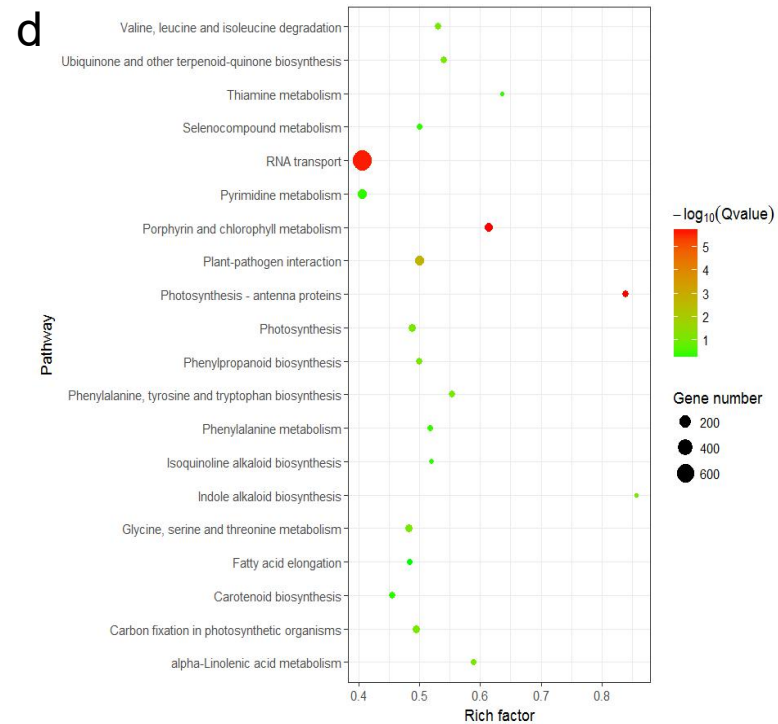

Fig. S9 a

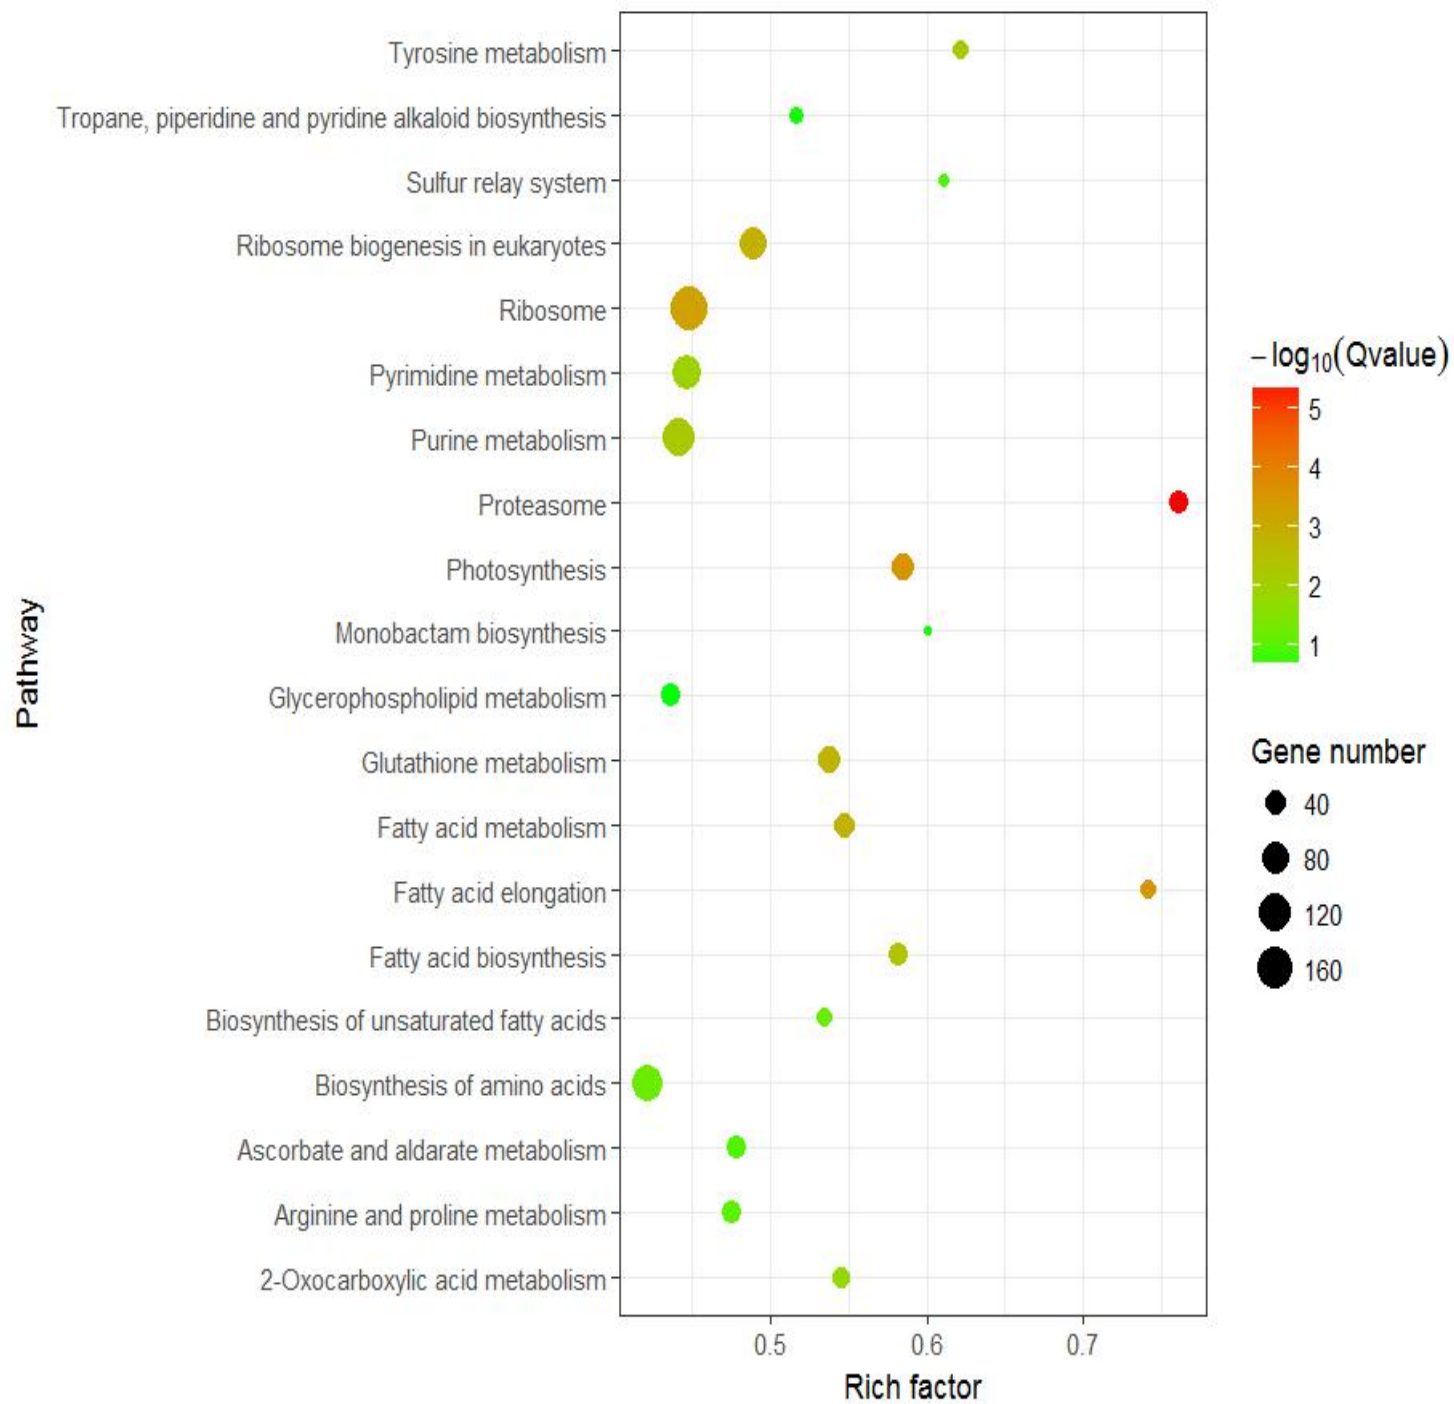

Fig. S9 b

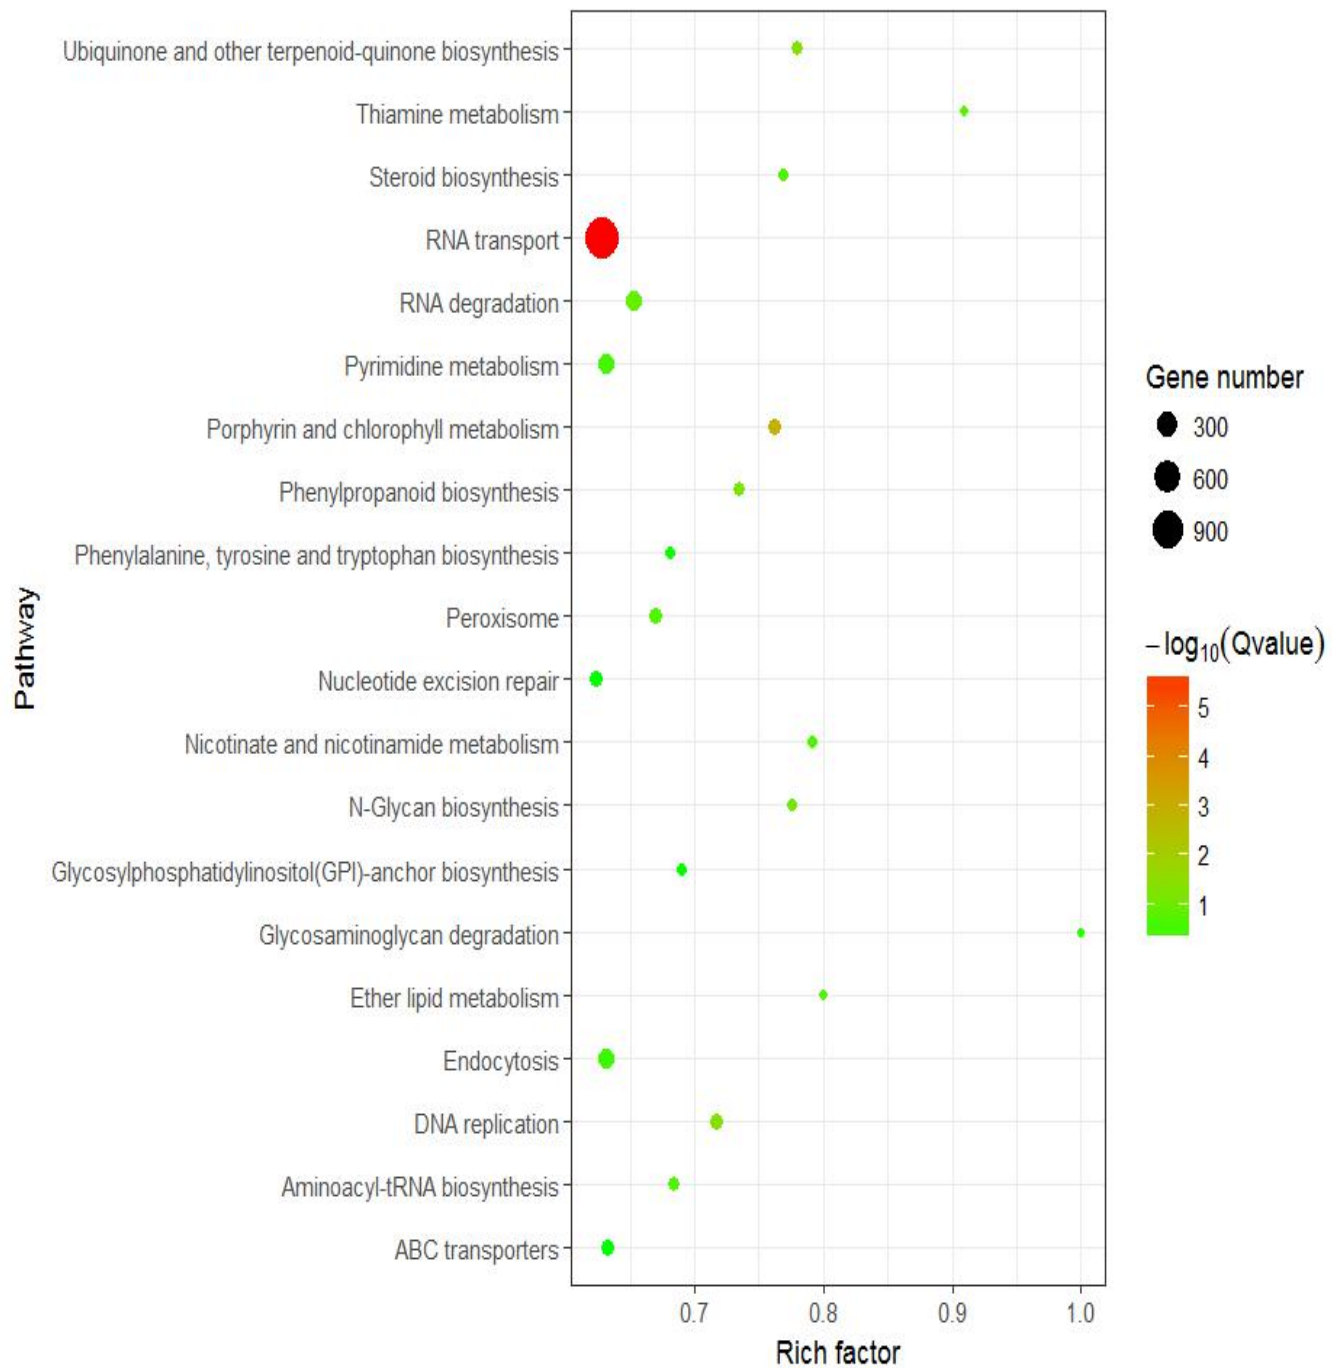

Fig. S9 c

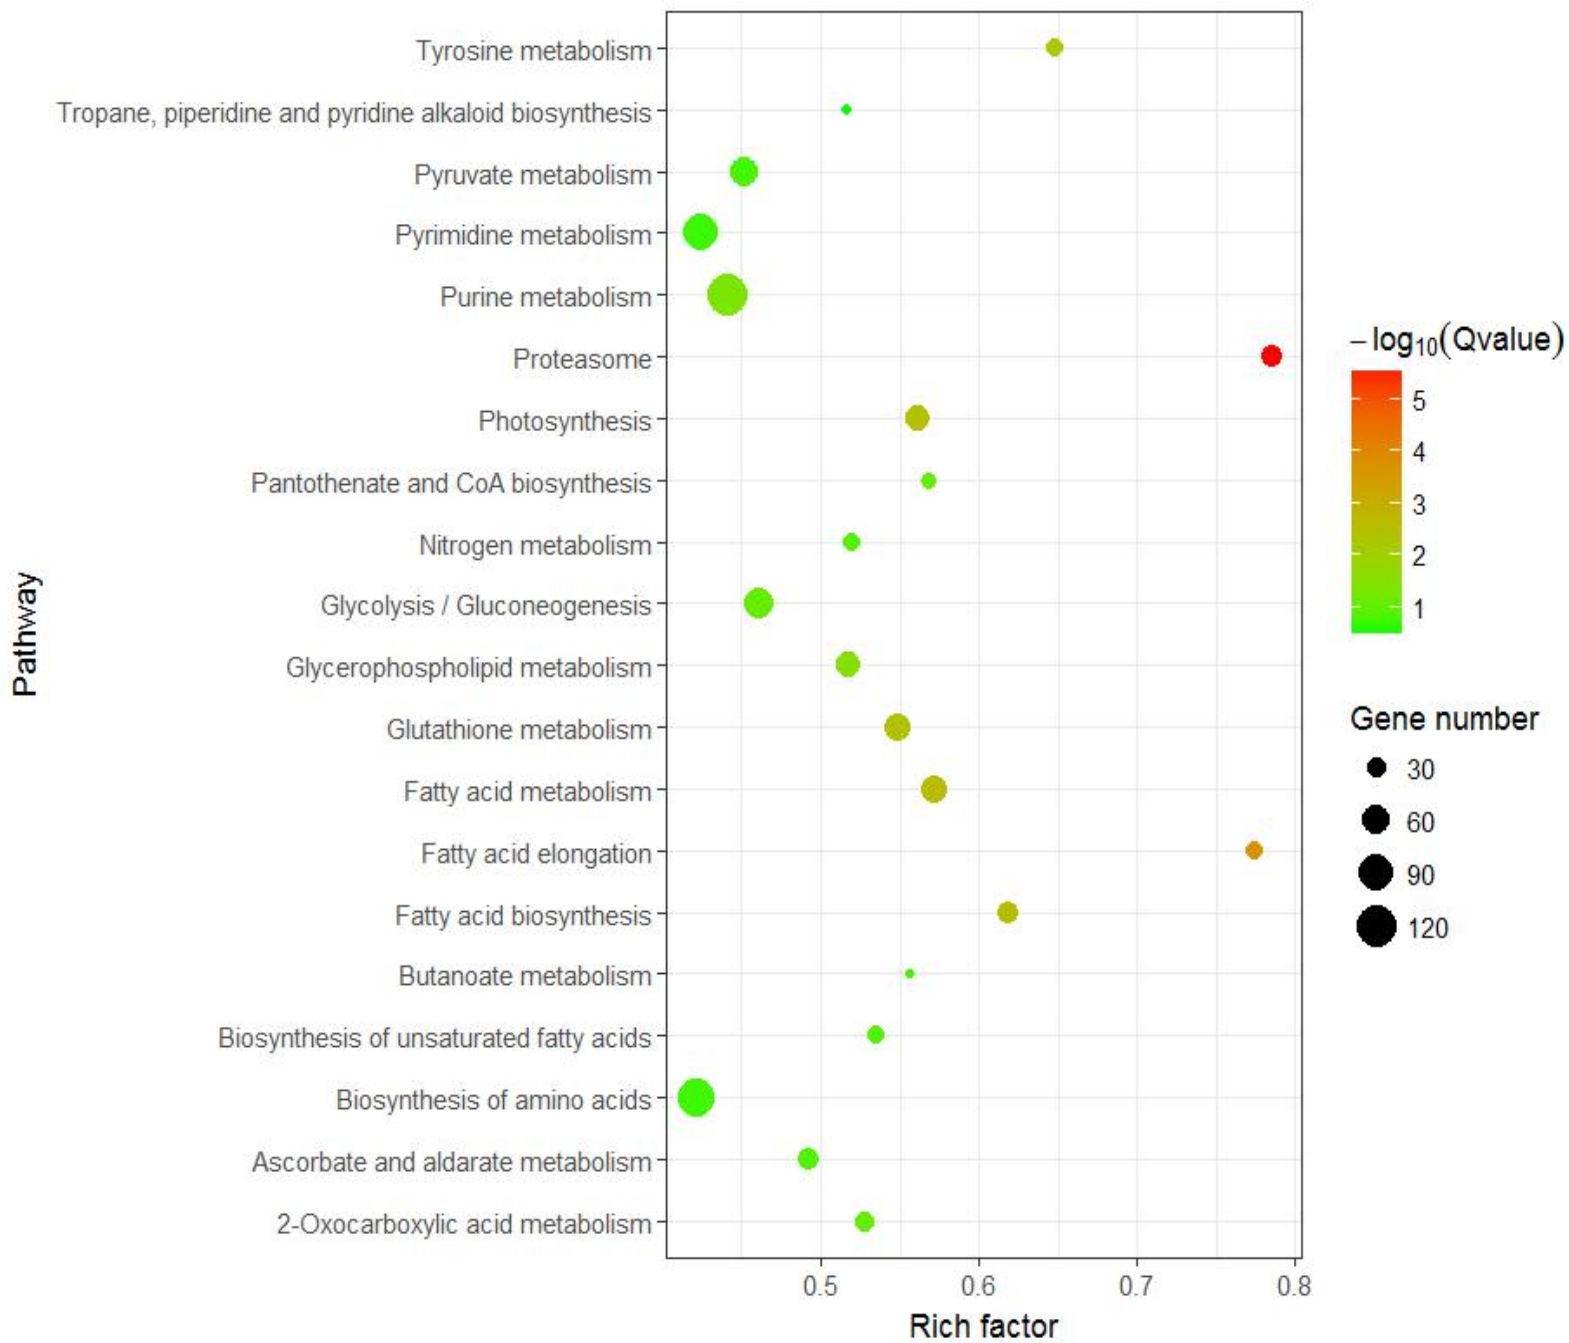

Fig. S9 d

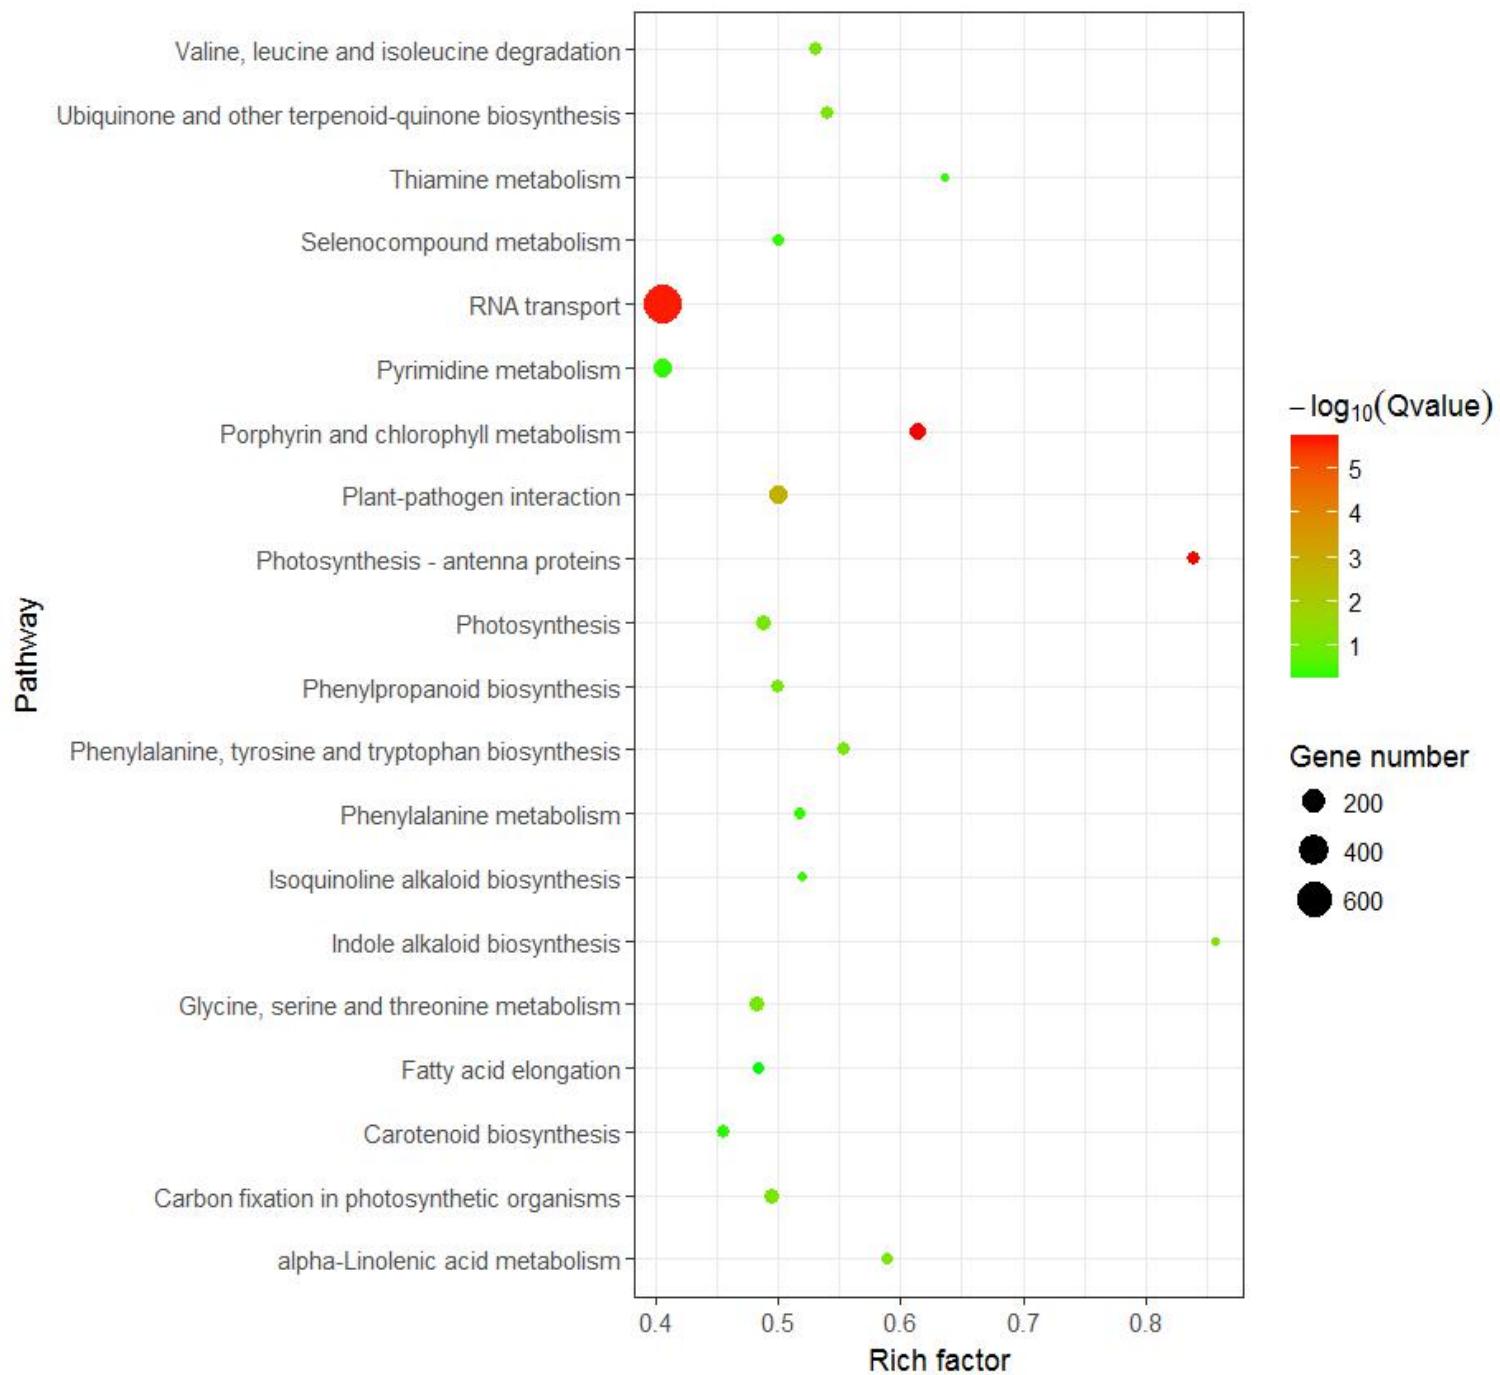

Fig. S10

a

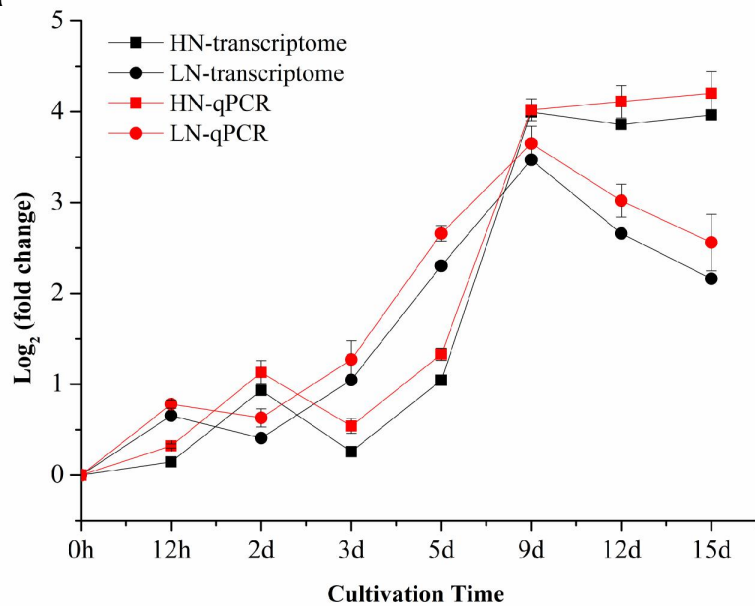

b

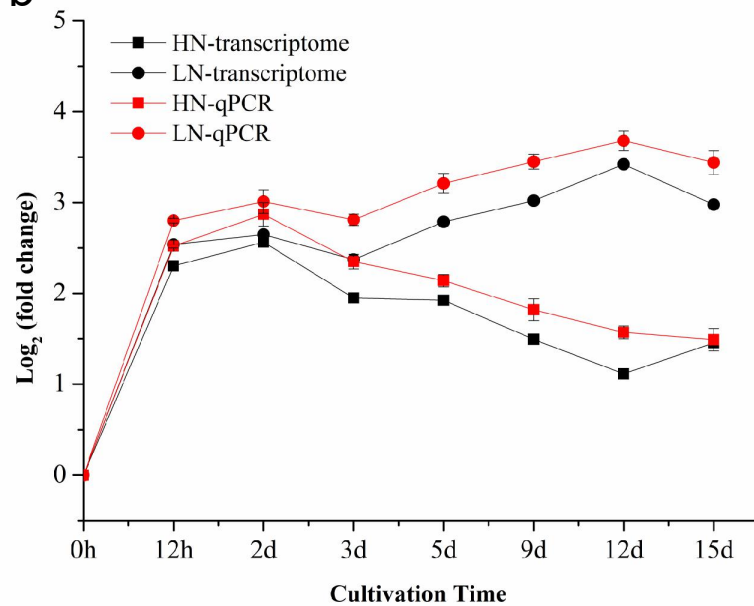

c

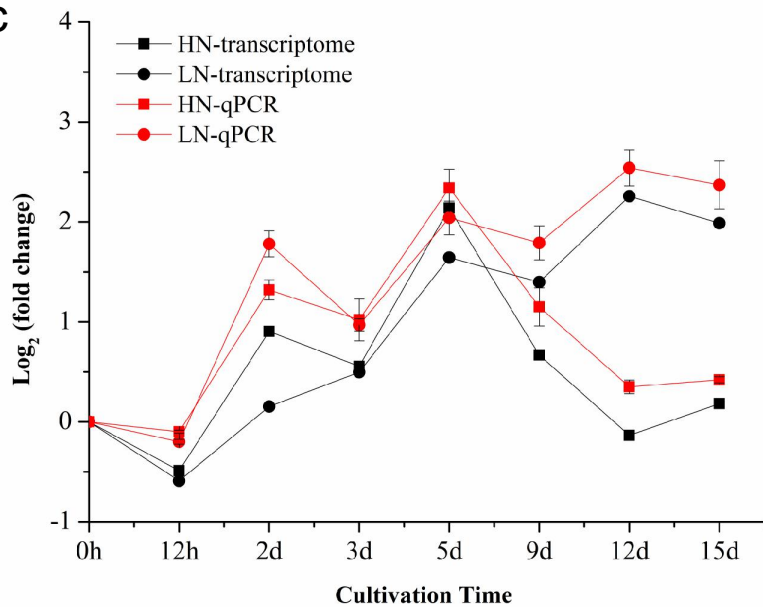

d

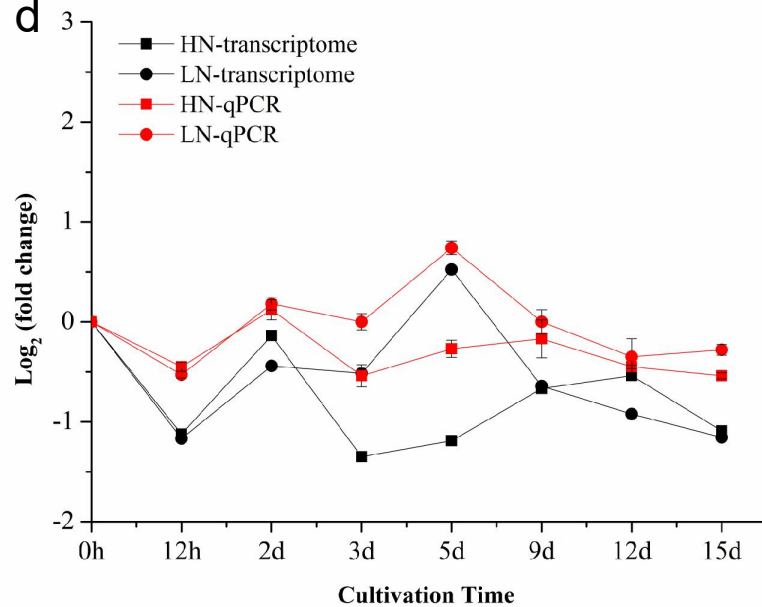

Supplement: 13068_2020_1868_MOESM1_ESM.pdf [file 13068_2020_1868_MOESM1_ESM.pdf]
